# Supplementary material for: Two new 1,2,4,5-cyclohexanetetracarboxylate-bridged frameworks with metal hydroxide subunits. Synthesis, structures, magnetism and adsorption
Source: Royal Society of Chemistry journal article supplement (doi:10.1039/c0dt01497d), 2011-01-01
Supplement: c0dt01497d.pdf [file c0dt01497d.pdf]

**ELECTRONIC SUPPLEMENTARY DATA**

for

**Two new 1,2,4,5-cyclohexanetetracarboxylate-bridged frameworks with metal hydroxide subunits. Synthesis, structures, magnetism and adsorption**

Yong-Cong Ou,<sup>a</sup> Jing Wang,<sup>a,b</sup> Ji-Dong Leng,<sup>a</sup> Zhuo-Jia Lin,<sup>a</sup> and Ming-Liang Tong<sup>\*a,c</sup>

<sup>a</sup> *Key Laboratory of Bioinorganic and Synthetic Chemistry of Ministry of Education / State Key Laboratory of Optoelectronic Materials and Technologies, School of Chemistry and Chemical Engineering, Sun Yat-Sen University, Guangzhou 510275, P. R. China*

<sup>b</sup> *School of Chemistry and Chemical Engineering, Guangzhou University, Guangzhou 510006, P. R. China*

<sup>c</sup> *State Key Laboratory of Structural Chemistry, Fujian Institute of Research on the Structure of Matter, Chinese Academy of Sciences, Fuzhou 350002, P. R. China*

E-mail: [tongml@mail.sysu.edu.cn](mailto:tongml@mail.sysu.edu.cn)

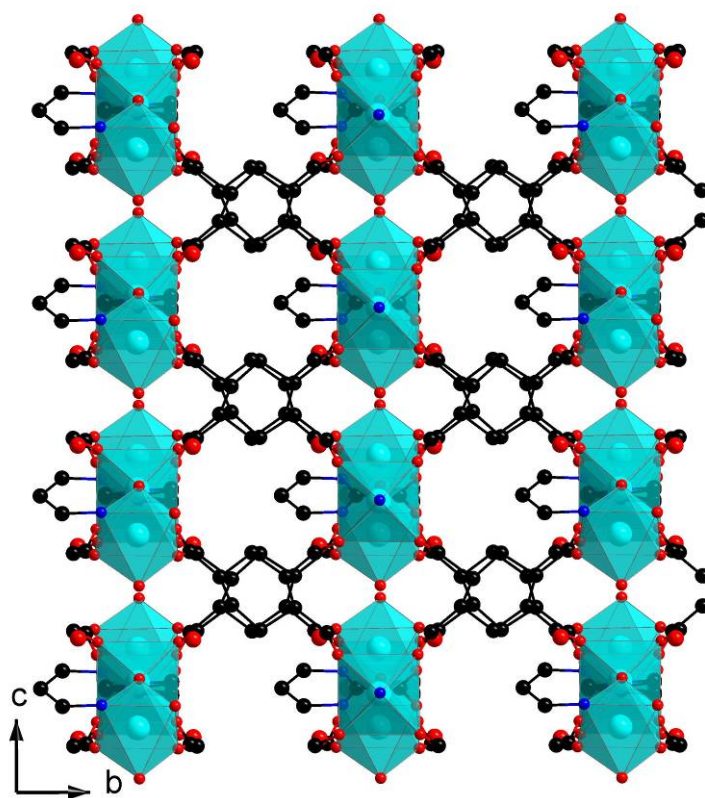

Figure S1. 3D coordinated network viewed along *a*-axis for complex **4** (atoms color: Ni, turquoise; O, red; N, blue; C, black).

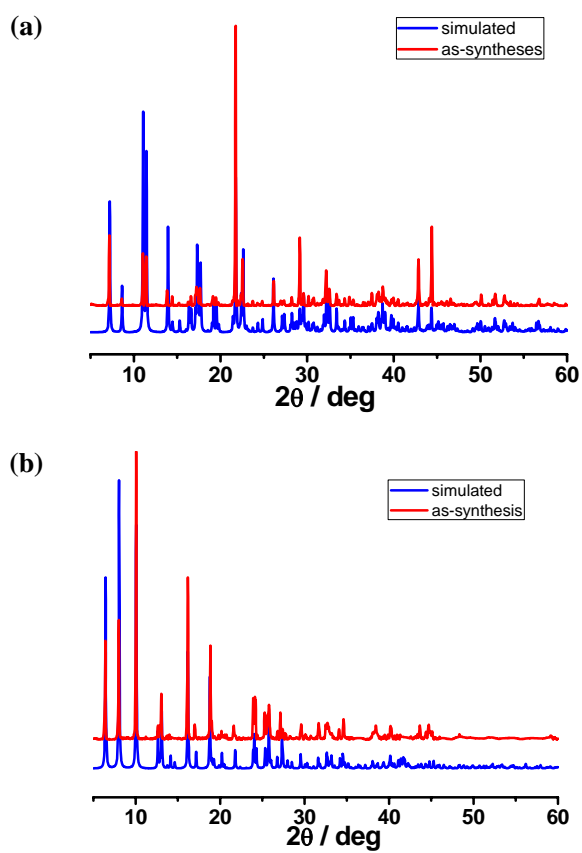

Figure S2. XRPD data for **1** (a) and **2** (b).

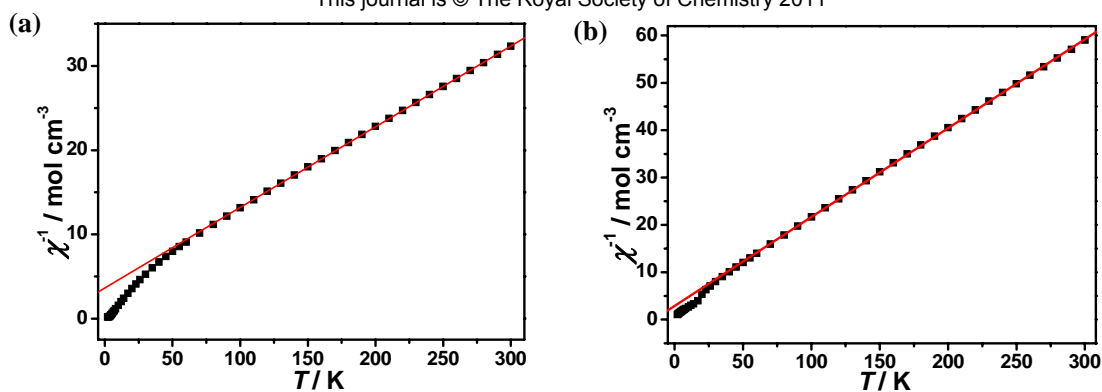

Figure S3. Temperature dependence of  $\chi^{-1}$  values for **1** (a) and **2** (b). The red line represents the best fit of the data with Curie-Weiss law.

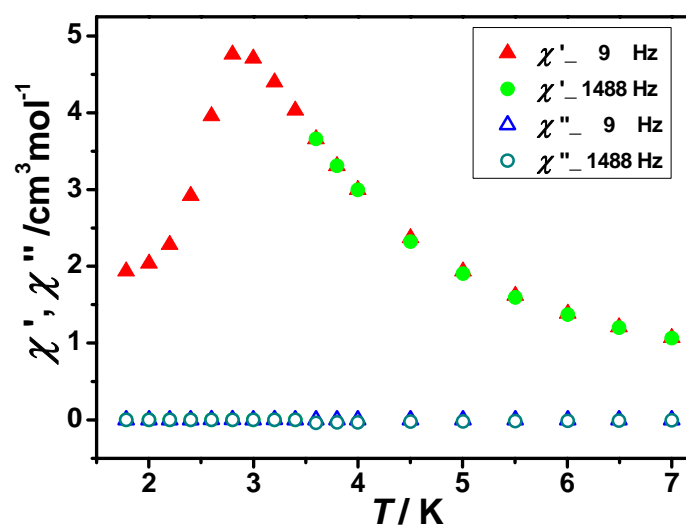

Figure S4. Temperature dependence of the real (top) and imaginary (bottom) components of the ac susceptibility in zero applied static field with an oscillating field of 5 Oe at frequencies of 9 and 1488 Hz for **1**.

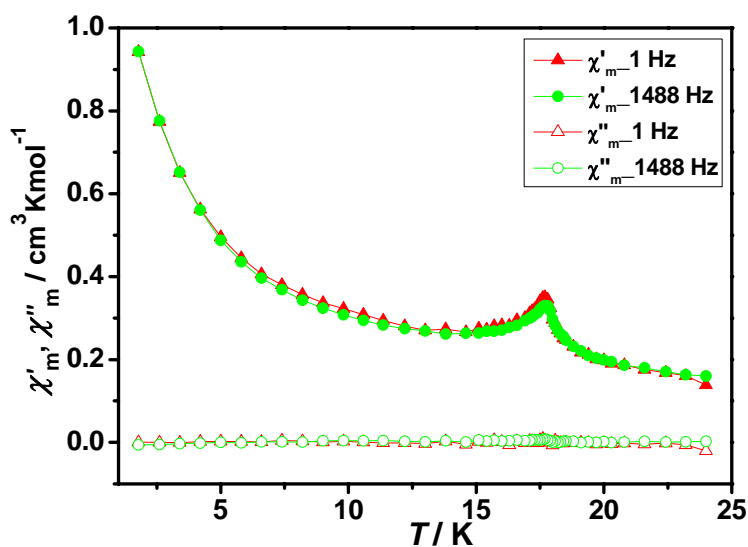

Figure S5. Temperature dependence of the real (top) and imaginary (bottom) components of the ac susceptibility in zero applied static field with an oscillating field of 5 Oe at frequencies of 1 and 1488 Hz for **2**.
